# Supplementary material
Source: publisher figshare collection journal article supplement (https://plos.figshare.com/articles/dataset/_/5482543)

## Safe Male Circumcision (SMC), Male Students (14-17 years)

### In Depth Interview Guide, For Use 6 Weeks-Post SMC

| <b>Opening Questions</b>                                                                                                                           |                                                                                                                                   |
|----------------------------------------------------------------------------------------------------------------------------------------------------|-----------------------------------------------------------------------------------------------------------------------------------|
| Opening questions are intended to build rapport and gradually lead into the key questions                                                          |                                                                                                                                   |
| Questions                                                                                                                                          | Probes/follow-ups                                                                                                                 |
| 1. What is your favourite soccer team?<br><br>2. Who is your favourite player? Why?                                                                | In Uganda? In England or Europe?                                                                                                  |
| <b>Key Questions – 1. Opening demographics</b>                                                                                                     |                                                                                                                                   |
| Questions                                                                                                                                          | Probes/follow-ups                                                                                                                 |
| 1. Which class and stream are you in?                                                                                                              | How old are you?                                                                                                                  |
| <b>Key Questions – 2. SMC information sources, decision-making, social context</b>                                                                 |                                                                                                                                   |
| Questions                                                                                                                                          | Probes/follow-ups                                                                                                                 |
| 1. We recently talked to you about safe male circumcision (SMC)? Was this the first time you heard about SMC? If not, where did you hear about it. | Clinic outreach activities?<br><br>Public education campaigns?<br><br>Public community meetings?<br><br>Discussion among friends? |

|                                                                                                                                                                                                                                                                                                       |  |
|-------------------------------------------------------------------------------------------------------------------------------------------------------------------------------------------------------------------------------------------------------------------------------------------------------|--|
| <ol style="list-style-type: none"> <li>2. What are the main reasons you decided to get circumcised?</li> <li>3. Whom did you talk to about circumcision?</li> <li>4. How helpful was the coach in your decision to become circumcised?</li> <li>5. Who else helped you with your decision?</li> </ol> |  |
| <ol style="list-style-type: none"> <li>6. What was your first reaction when you heard about circumcision?</li> <li>7. What kinds of concerns or fears did you have?</li> <li>8. How has your opinion about circumcision changed since being circumcised?</li> </ol>                                   |  |

## Key Questions – 3. Experiences of SMC process – accompaniment and counselling

| Questions                                                                                                                                                                                                                                                                                                                                                                                                                                                                                                   | Probes/follow-ups                                                                                                                                                                                                                                                                                    |
|-------------------------------------------------------------------------------------------------------------------------------------------------------------------------------------------------------------------------------------------------------------------------------------------------------------------------------------------------------------------------------------------------------------------------------------------------------------------------------------------------------------|------------------------------------------------------------------------------------------------------------------------------------------------------------------------------------------------------------------------------------------------------------------------------------------------------|
| <p>1. Now, let's talk about what happened on the day you went for circumcision. Who accompanied you to the clinic on the day of the procedure?</p>                                                                                                                                                                                                                                                                                                                                                          | <p>How influential was the person who accompanied you in making the decision to get circumcised?</p> <p>How were you feeling when you arrived at the clinic?</p>                                                                                                                                     |
| <p>2. Do you remember attending a counselling session before getting circumcised? What information did you receive about circumcision during the counselling session?</p> <p>3. Was this information helpful? Why or why not?</p> <p>4. During counselling, did you learn any new information about SMC? Did it change the way you felt about circumcision? How?</p> <p>5. After the counselling, did you have any further questions about the SMC procedure? What additional information did you want?</p> | <p>Were the benefits of SMC explained to you? What were the most important benefits to you? Why?</p> <p>Were the risks of SMC explained to you? Which of those worried you the most? Why?</p> <p>Did the counsellor discuss sex and HIV prevention with you? If so, what did the counsellor say?</p> |

## Key Questions – 4. Experiences of SMC process – procedure

| Questions                                                                                                                                                                                                                                     | Probes/follow-ups                                                                                                                                                                                                                                    |
|-----------------------------------------------------------------------------------------------------------------------------------------------------------------------------------------------------------------------------------------------|------------------------------------------------------------------------------------------------------------------------------------------------------------------------------------------------------------------------------------------------------|
| <ol style="list-style-type: none"> <li>1. Looking back on your experience of the circumcision procedure, how did it compare to what you expected?</li> <li>2. How would you explain to a friend what to expect from the procedure?</li> </ol> | <p>Was it more or less painful?</p> <p>What was similar to what you expected?</p> <p>What was different to what you expected?</p> <p>What was the easiest part about the procedure?</p> <p>What was the most difficult part about the procedure?</p> |

## Key Questions – 5. Experiences of SMC process – healing

| Questions                                                                                                                                                                                                                                                          | Probes/follow-ups                                                                                                                                                                                                         |
|--------------------------------------------------------------------------------------------------------------------------------------------------------------------------------------------------------------------------------------------------------------------|---------------------------------------------------------------------------------------------------------------------------------------------------------------------------------------------------------------------------|
| <ol style="list-style-type: none"> <li>1. Looking back on your experience of healing after the circumcision procedure, how does it compare to what you expected?</li> <li>2. How would you explain to a friend what to expect from the healing process?</li> </ol> | <p>Was it more or less painful?</p> <p>What was similar to what you expected?</p> <p>What was different to what you expected?</p> <p>What instructions did you receive to take care of the wound? Were these helpful?</p> |
| <ol style="list-style-type: none"> <li>3. Have you recommended circumcision to a friend?</li> </ol> <p>If not, why not?</p>                                                                                                                                        | <p>How was it received?</p>                                                                                                                                                                                               |

**Thank you for your participation. Your involvement is really important to us, and we appreciate you sharing your personal experiences.**

**Before we end, do you have any questions for me about safe male circumcision, the interview, or other information we have discussed?**

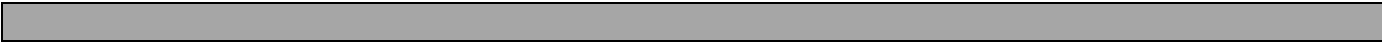

Supplement: Supplementary file 1 [file 1 › S1 File.pdf]
