# Supplementary material
Source: publisher figshare collection journal article supplement (https://plos.figshare.com/articles/dataset/_/5482543)
Supplement: Supplementary file 1 [file 1 › S2 File.pdf]

## Safe Male Circumcision (SMC), Male Students (14-17 years)

### In Depth Interview Guide, For Use 6 Weeks-Post SMC

#### Opening Questions

Opening questions are intended to build rapport and gradually lead into the key questions

| Questions                                                                           | Probes/follow-ups                |
|-------------------------------------------------------------------------------------|----------------------------------|
| 1. What is your favourite soccer team?<br><br>2. Who is your favourite player? Why? | In Uganda? In England or Europe? |

#### Key Questions – 1. Opening demographics

| Questions                             | Probes/follow-ups |
|---------------------------------------|-------------------|
| 1. Which class and stream are you in? | How old are you?  |

#### Key Questions – 2. SMC information sources, decision-making, social context

| Questions                                                                                        | Probes/follow-ups                                                                                                                 |
|--------------------------------------------------------------------------------------------------|-----------------------------------------------------------------------------------------------------------------------------------|
| 1. How did you first hear about safe male circumcision (SMC)? When did you first hear about SMC? | Clinic outreach activities?<br><br>Public education campaigns?<br><br>Public community meetings?<br><br>Discussion among friends? |

|                                                                                     |                                                                                                                                         |
|-------------------------------------------------------------------------------------|-----------------------------------------------------------------------------------------------------------------------------------------|
| 2. Why did you choose not to get circumcised?                                       | Improved sexual performance? Decreased HIV risk? Hygiene?                                                                               |
| 3. Whom did you talk to about circumcision?                                         | What was the most important factor in your decision to get circumcised?                                                                 |
| 4. Whose views were most influential in making the decision not to get circumcised? | What did you hear about circumcision from your parent/guardian? Friends? Other people (Uncle, teacher, priest, community leader, etc.)? |
| 5. What was your first reaction when you heard about circumcision?                  | What kinds of concerns or fears did you have?                                                                                           |
| 6. Are you considering getting circumcised?                                         |                                                                                                                                         |
| 7. What would it take for you to decide to get circumcised?                         |                                                                                                                                         |

**Thank you for your participation. Your involvement is really important to us, and we appreciate you sharing your personal experiences.**

**Before we end, do you have any questions for me about safe male circumcision, the interview, or other information we have discussed?**
